# Supplementary material
Source: publisher figshare collection journal article supplement (https://sage.figshare.com/ndownloader/files/13748561)
Supplement: Supplementary file 1 [file 13748561]

Supplementary material Table B. Percentage of organic carbon and carbonates of Suriano and Cabeza de Buey 2 (LCB2) sediments.

| Section | Sample | Depth (cm) | % Organic carbon | % Carbonate |
| --- | --- | --- | --- | --- |
| Suriano | LB 15-24 | 0.2 | 1.95 | 0.03 |
|  | LB 15-25 | 0.5 | 2.03 | 0.03 |
|  | LB 15-26 | 1.0 | 1.90 | 0.03 |
|  | LB 15-27 | 1.4 | 1.48 | 0.03 |
|  | LB 15-28-RUC* | 1.5 | 3.50 | 2.10 |
|  | LB 15-29 | 1.7 | 1.49 | 0.03 |
|  | LB 15-30 | 2.4 | 1.68 | 0.04 |
| LCB2 | LCB2 M-5 | 11.0 | 3.97 | 0.79 |
|  | LB 15-01 | 13.0 | 2.89 | 1.21 |
|  | LB 15-02 | 22.0 | 2.37 | 0.99 |
|  | LCB2 M-4 | 30.0 | 2.46 | 1.64 |
|  | LB 15-03 | 34.0 | 3.01 | 1.66 |
|  | LB 15-04 | 45.0 | 2.25 | 1.56 |
|  | LB 15-05 | 57.0 | 2.16 | 1.45 |
|  | LCB2 M-3 | 64.0 | 1.09 | 1.09 |
|  | LB 15-06 | 67.0 | 1.83 | 1.24 |
|  | LB 15-07 | 77.0 | 2.01 | 0.89 |
|  | LB 15-08 | 87.0 | 2.19 | 2.32 |
|  | LB 15-09 | 97.0 | 2.82 | 5.63 |
|  | LB 15-10 | 108.0 | 2.67 | 5.73 |
|  | LCB2 M-2 | 111.0 | 2.07 | 2.59 |
|  | LB 15-11 | 114.0 | 2.70 | 5.54 |
|  | LB 15-32 | 121.0 | 2.26 | 2.29 |
|  | LCB2 M-1 | 122.0 | 2.00 | 4.62 |

* RUC is rip-up clasts.
